# Supplementary material for: N-3-oxo-hexanoyl-homoserine lactone, a bacterial quorum sensing signal, enhances salt tolerance in Arabidopsis and wheat
Source: PubMed Central journal article supplement (PMC7064656; doi:10.1186/s40529-020-00283-5), 2020-03-10
Supplement: 40529_2020_283_MOESM1_ESM.pdf [file 40529_2020_283_MOESM1_ESM.pdf]

**Additional File 1: Table S1. Primer information of genes investigated in qRT-PCR**

| Gene          | Forward Primer (5'→3')    | Reverse Primer (5'→3')    |
|---------------|---------------------------|---------------------------|
| <i>ERD1</i>   | ATTGCTGCTATGCTTTTCTGTGGAC | CGAACAAAACCACTGTAAAAGGACG |
| <i>RD29B</i>  | ATGAGTATGACGAGCAAGACCCAGA | TGTGGTCAGAAGACACGACAGGAA  |
| <i>RD22</i>   | TACCAAACACTCCCATTCCCAACT  | CACCTCCGTGACCTTTTCCG      |
| <i>COR15a</i> | TTCCACAGCGGAGCCAAG        | ACCATCTGCTAATGCCTCTTTTGT  |
| <i>P5CS1</i>  | TGTTCCACAACGCCAGCAC       | TGGGAATGTCCTGATGGGGTG     |
| <i>ADH</i>    | CTCTTGGTGCTGTTGGTTTAGG    | AATTGGCTTGTCATGGTCTTTC    |
| <i>SOS1</i>   | TTCATCATCCTCACAATGGCTCTAA | TATTCTGCCCTCATCAAGCATCTCC |
| <i>SOS2</i>   | TATTTGGTCTTGCGGGGTTAT     | GATTGGGGTCAAGTATCCTATGTAT |
| <i>SOS3</i>   | CGGTCCTTAGGTGTCTTCCATCC   | GCACGAAAGCCTTATCCACCAT    |
| <i>Actin2</i> | CCAGAAGGATGCATATGTTGGTGA  | GAGGAGCCTCGGTAAGAAGA      |
